# Supplementary material for: Theabrownin-targeted regulation of intestinal microorganisms to improve glucose and lipid metabolism in Goto-Kakizaki rats
Source: Royal Society of Chemistry journal article supplement (doi:10.1039/d1fo03374c), 2021-12-20
Supplement: d1fo03374c1.pdf [file d1fo03374c1.pdf]

**Appendix Table 1 Impact of TB on the significant pathways**

| Pathway                        |           | Gene<br>GK-vs-GK-<br>TB (431) | Gene_All<br>(7708) | Gene_Pvalue | Gene_Qvalue | Metabolites<br>Count<br>(2812) | Pathway<br>ID | Genes                                                                                                                                                                                                                                                                          |
|--------------------------------|-----------|-------------------------------|--------------------|-------------|-------------|--------------------------------|---------------|--------------------------------------------------------------------------------------------------------------------------------------------------------------------------------------------------------------------------------------------------------------------------------|
| Insulin pathway                | signaling | 19                            | 127                | 7.32E-05    | 0.005345768 | 9                              | ko04910       | Acacb;Mapk1;Srebf1;Prkacb;Pygb;Prkaa2;Socs2;Flot2;Foxo1;Rapgef1;Sorbs1;Fbp2;Ptprf;Mapk8;Prkar2a;Pklr;Crk;Pck1;Fasn                                                                                                                                                             |
| Thyroid signaling pathway      | hormone   | 16                            | 113                | 0.000507806 | 0.021182748 | 4                              | ko04919       | Notch4;Slc16a10;Mapk1;Slc16a2;Prkacb;Med1;Ncoa3;Ncoa2;Tbc1d4;Rxra;Med12l;Foxo1;Actg1;Itgb3;LOC100361457;Ctnnb1                                                                                                                                                                 |
| Glycerophospholipid metabolism |           | 14                            | 97                 | 0.00092564  | 0.027211821 | 229                            | ko00564       | Cds1;Lpin1;Lpgat1;Pnpla7;Pla2g6;Etnk1;Lpin2;Pisd;Pld2;Dgkd;Etnk2;Lclat1;Etnppl;Pla2g12a                                                                                                                                                                                        |
| Vascular muscle contraction    | smooth    | 16                            | 121                | 0.001086261 | 0.027211821 | 2                              | ko04270       | Itpr2;Mapk1;Adcy5;Prkeh;Prkacb;Gna11;Kenma1;Arhgef12;Cyp4a1;Pla2g6;Cyp4a2;Adcy9;Ppp1r12b;Itpr3;Ppp1r12c;Pla2g12a                                                                                                                                                               |
| Apoptosis                      |           | 17                            | 133                | 0.001128762 | 0.027211821 | 1                              | ko04210       | Csf2rb;Itpr2;Mapk1;Tuba4a;Xiap;Fos;Eif2s1;Cflar;Gadd45g;Casp2;Gadd45b;Mapk8;Map3k5;Actg1;Pidd1;Itpr3;LOC100361457                                                                                                                                                              |
| FoxO pathway                   | signaling | 16                            | 122                | 0.001187659 | 0.027211821 | 7                              | ko04068       | Foxo3;Bcl6;Mapk1;Prkaa2;Gadd45g;Tgfbr2;Foxo1;Stat3;Gadd45b;Mapk8;Usp7;Agap2;Pck1;Sgk3;Smad4;Cnd2                                                                                                                                                                               |
| Pathways in cancer             |           | 45                            | 510                | 0.001354603 | 0.027211821 | 34                             | ko05200       | Csf2rb;Notch4;Lama4;Mapk1;Adcy5;Lamc2;Prkacb;Gna11;Ncoa3;Lrp6;Xiap;Fos;Traf3;Pml;Arhgef12;Rxra;Lpar2;Ednrb;Gadd45g;Il13ra1;Tgfbr2;Foxo1;Il6st;Fgfr1;Fgfr2;Tpm3;Stat3;Gadd45b;Mapk8;Il6r;Col4a2;Ccdc6;Tert;Crk;Arnt;Rasgrp3;Adcy9;Smad4;Met;Lama5;Ctnnb1;Gsta3;Gnai1;Cnd2;Lamc3 |
| GnRH pathway                   | signaling | 13                            | 90                 | 0.001386032 | 0.027211821 | 2                              | ko04912       | Itpr2;Mapk1;Adcy5;Map2k6;Prkacb;Gna11;Mmp14;Map3k1;Egr1;Pld2;Mapk8;Adcy9;Itpr3                                                                                                                                                                                                 |

|                                 |    |     |             |             |    |         |                                                                                                  |
|---------------------------------|----|-----|-------------|-------------|----|---------|--------------------------------------------------------------------------------------------------|
| Adipocytokine signaling pathway | 11 | 69  | 0.00141297  | 0.027211821 | 1  | ko04920 | Acacb;Prkaa2;Adipor2;Rxra;Cpt1b;Cpt1a;Stat3;Mapk8;Pck1;Ptpn11;RGD1565355                         |
| Bile secretion                  | 11 | 70  | 0.001594212 | 0.027211821 | 81 | ko04976 | Adcy5;Slc4a4;Prkacb;Abcg5;Abcg8;Rxra;Abcc4;Nceh1;Slc4a2;Slc5a1;Adcy9                             |
| Insulin resistance              | 14 | 103 | 0.001677099 | 0.027211821 | 26 | ko04931 | Acacb;Srebf1;Pygb;Prkaa2;Tbc1d4;Cpt1b;Foxo1;Cpt1a;Stat3;Ptprf;Mapk8;Pck1;Ptpn11;RGD1565355       |
| AMPK signaling pathway          | 15 | 120 | 0.002706305 | 0.039512053 | 21 | ko04152 | Foxo3;Acacb;Srebf1;Prkaa2;Adipor2;Cpt1b;Ppp2r1b;Foxo1;Scd;Cpt1a;Fbp2;Pfkfb3;Pck1;RGD1565355;Fasn |

**Appendix Table 2 Intergroup differentially expressed genes**

| GK_<br>mean | GK-TB<br>_mean | log2(fc)_GK<br>-vs-GK-TB | Symbol  | Description                                                   |
|-------------|----------------|--------------------------|---------|---------------------------------------------------------------|
| 3.40        | 13.79          | **2.02                   | Abcg5   | ATP binding cassette subfamily G member 5                     |
| 0.41        | 1.28           | **1.63                   | Abcg8   | ATP binding cassette subfamily G member 8                     |
| 2.10        | 12.44          | **2.56                   | Acadsb  | acyl-CoA dehydrogenase, short/branched chain                  |
| 0.01        | 0.18           | **3.75                   | Ace     | angiotensin I converting enzyme                               |
| 1.60        | 3.56           | **1.16                   | Acot9   | acyl-CoA thioesterase 9                                       |
| 12.65       | 25.7           | **1.02                   | Acox3   | acyl-CoA oxidase 3, pristanoyl                                |
| 36.93       | 163.18         | **2.14                   | Acsm5   | acyl-CoA synthetase medium-chain family member 5              |
| 0.03        | 0.13           | *2.00                    | Adcy10  | adenylate cyclase 10                                          |
| 0.37        | 0.80           | **1.11                   | Adcy5   | adenylate cyclase 5                                           |
| 0.77        | 1.59           | **1.04                   | Adcy9   | adenylate cyclase 9                                           |
| 5.11        | 11.48          | **1.17                   | Adipor2 | adiponectin receptor 2                                        |
| 36.68       | 110.91         | **1.60                   | Aldh1a1 | aldehyde dehydrogenase 1 family, member A1                    |
| 13.88       | 54.7           | **1.98                   | Cpt1a   | carnitine palmitoyltransferase 1A                             |
| 0.08        | 0.27           | *1.75                    | Cpt1b   | carnitine palmitoyltransferase 1B                             |
| 102.21      | 209.6          | **1.04                   | Ech1    | enoyl-CoA hydratase 1                                         |
| 25.08       | 73.7           | **1.55                   | Fads6   | fatty acid desaturase 6                                       |
| 0.39        | 1.67           | **2.09                   | Foxo1   | forkhead box O1                                               |
| 2.45        | 7.69           | **1.65                   | Igf2bp3 | insulin-like growth factor 2 mRNA binding protein 3           |
| 1.56        | 3.9            | **1.30                   | Igf2r   | insulin-like growth factor 2 receptor                         |
| 12.63       | 43.8           | **1.79                   | Igfbp1  | insulin-like growth factor binding protein 1                  |
| 4.82        | 29.0           | **2.59                   | Igfbp2  | insulin-like growth factor binding protein 2                  |
| 0.00        | 0.12           | *6.95                    | Igfbp1l | insulin-like growth factor binding protein-like 1             |
| 0.00        | 0.35           | **8.46                   | Lpar2   | lysophosphatidic acid receptor 2                              |
| 6.26        | 13.5           | **1.10                   | Lpgat1  | lysophosphatidylglycerol acyltransferase 1                    |
| 4.81        | 11.83          | **1.30                   | Lrp11   | LDL receptor related protein 11                               |
| 0.63        | 1.50           | **1.26                   | Lrp6    | LDL receptor related protein 6                                |
| 1.08        | 2.37           | *1.14                    | Mapk8   | mitogen-activated protein kinase 8                            |
| 440.80      | 891.4          | **1.02                   | Pck1    | phosphoenolpyruvate carboxykinase 1                           |
| 98.30       | 205.90         | **1.07                   | Por     | cytochrome p450 oxidoreductase                                |
| 0.94        | 2.92           | **1.64                   | Prkaa2  | protein kinase AMP-activated catalytic subunit alpha 2        |
| 0.23        | 2.08           | **3.16                   | Prkacb  | protein kinase cAMP-activated catalytic subunit beta          |
| 0.62        | 5.5            | **3.14                   | Prkar2a | protein kinase cAMP-dependent type 2 regulatory subunit alpha |
| 10.72       | 35.9           | **1.74                   | Rxra    | retinoid X receptor alpha                                     |
| 0.16        | 0.59           | *1.90                    | Sgk3    | serum/glucocorticoid regulated kinase family, member 3        |
| 3.76        | 7.66           | **1.03                   | Slc4a2  | solute carrier family 4 member 2                              |
| 0.12        | 0.67           | **2.45                   | Slc4a4  | solute carrier family 4 member 4                              |
| 5.88        | 13.44          | **1.19                   | Tsc22d3 | TSC22 domain family, member 3                                 |
| 3.33        | 2.23           | -0.58                    | Acot5   | acyl-CoA thioesterase 5                                       |
| 180.32      | 85.5           | **1.08                   | Angptl8 | angiopoietin-like 8                                           |

---

|         |        |          |        |                                                          |
|---------|--------|----------|--------|----------------------------------------------------------|
| 1409.77 | 931.13 | -0.60    | Apoa4  | apolipoprotein A4                                        |
| 25.49   | 9.8    | ** -1.38 | Fabp5  | fatty acid binding protein 5                             |
| 14.10   | 6.2    | ** -1.18 | Fasn   | fatty acid synthase                                      |
| 79.90   | 37.4   | ** -1.10 | Pklr   | pyruvate kinase L/R                                      |
| 692.36  | 249.8  | ** -1.47 | Scd    | stearoyl-CoA desaturase                                  |
| 88.91   | 41.54  | ** -1.10 | Srebf1 | sterol regulatory element binding transcription factor 1 |

---

**Appendix Table 3 Feces metabolite statistics of significant differences of GKf-vs-GK-TBf**

| index | GKf_<br>mean | GK-TBf<br>_mean | log2_<br>FC | Pvalue | vip  | MS2 name                                         | MS2<br>score | CAS      | C_ID   |
|-------|--------------|-----------------|-------------|--------|------|--------------------------------------------------|--------------|----------|--------|
| POS   | 543533       | 30124227        | 5.79        | 0.000  | 4.21 | (R)-5-Phosphomevalonate                          | 0.645        | -        | C01107 |
| POS   | 2184484      | 30105966        | 3.78        | 0.027  | 3.32 | Caffeine                                         | 0.991        | -        | C07481 |
| POS   | 534449       | 6299661         | 3.56        | 0.000  | 1.89 | 4-Amino-2,6-dinitrotoluene                       | 0.520        | -        | C16394 |
| POS   | 19738354     | 127236313       | 2.69        | 0.000  | 7.85 | 1,3,7-Trimethyluric acid                         | 1.000        | -        | C16361 |
| POS   | 5498003      | 28544453        | 2.38        | 0.000  | 3.52 | 1,7-Dimethyluric acid                            | 0.994        | -        | C16356 |
| POS   | 7449206      | 34600043        | 2.22        | 0.030  | 3.20 | Theophylline                                     | 0.999        | 58-55-9  | C07130 |
| POS   | 2453952      | 9369814         | 1.93        | 0.001  | 1.91 | Westcort                                         | 0.918        | -        | C00762 |
| POS   | 1754898      | 6537842         | 1.90        | 0.000  | 1.72 | 25-Hydroxycholecalciferol                        | 0.859        | -        | C01561 |
| POS   | 6580470      | 24501977        | 1.90        | 0.000  | 3.33 | Cholic Acid                                      | 0.890        | 81-25-4  | C00695 |
| POS   | 1219085      | 4190425         | 1.78        | 0.001  | 1.24 | theobromine                                      | 0.982        | -        | C07480 |
| POS   | 10461231     | 34762920        | 1.73        | 0.000  | 3.87 | 4a-Carboxy-4b-methyl-5a-cholesta-8,24-dien-3b-ol | 0.610        | -        | C15808 |
| POS   | 1982688      | 5847171         | 1.56        | 0.000  | 1.52 | cis-9,10-Epoxystearic acid                       | 0.996        | -        | C19418 |
| POS   | 25929082     | 70933157        | 1.45        | 0.000  | 5.08 | Adenine                                          | 0.998        | 73-24-5  | C00147 |
| POS   | 1770616      | 4197239         | 1.25        | 0.000  | 1.20 | Xanthurenic acid                                 | 0.941        | 59-00-7  | C02470 |
| POS   | 7253017      | 15188313        | 1.07        | 0.005  | 1.91 | Glycocholic Acid                                 | 0.892        | 475-31-0 | C01921 |
| POS   | 29519634     | 55469025        | 0.91        | 0.021  | 3.25 | Deamino-alpha-keto-demethylphosphinothricin      | 0.784        | -        | C17948 |
| POS   | 22887387     | 36602140        | 0.68        | 0.017  | 2.48 | Citrulline                                       | 0.997        | -        | C00327 |
| POS   | 18905776     | 27867076        | 0.56        | 0.037  | 1.91 | 5-Hydroxyectoine                                 | 0.566        | -        | C16432 |
| POS   | 28563479     | 41835182        | 0.55        | 0.004  | 2.49 | Glycochenodeoxycholic acid                       | 0.609        | 640-79-9 | C05466 |
| POS   | 14112248     | 20433803        | 0.53        | 0.000  | 1.91 | Testosterone                                     | 0.997        | 58-22-0  | C00535 |
| POS   | 9278726      | 13047089        | 0.49        | 0.009  | 1.32 | Dihydropteroic acid                              | 0.680        | -        | C00921 |
| POS   | 17904252     | 24197821        | 0.43        | 0.000  | 1.89 | 4-Pyridoxic acid                                 | 0.594        | 82-82-6  | C00847 |

|     |           |           |       |       |      |                          |       |           |        |
|-----|-----------|-----------|-------|-------|------|--------------------------|-------|-----------|--------|
| POS | 138995219 | 165781179 | 0.25  | 0.040 | 3.26 | Choline                  | 1.000 | 62-49-7   | C00114 |
| POS | 17587629  | 19557974  | 0.15  | 0.000 | 1.03 | 9-Hydroxyfluorene        | 0.828 | -         | C06711 |
| POS | 7363823   | 5205374   | -0.50 | 0.001 | 1.05 | Anhalamine               | 0.997 | -         | C12231 |
| POS | 32680444  | 21368127  | -0.61 | 0.003 | 2.33 | Sphingosine              | 0.909 | -         | C00319 |
| POS | 9744273   | 6167947   | -0.66 | 0.044 | 1.15 | Phenylacetaldehyde       | 0.958 | 122-78-1  | C00601 |
| POS | 11737640  | 6726318   | -0.80 | 0.035 | 1.34 | Uracil                   | 0.965 | 66-22-8   | C00106 |
| POS | 337355375 | 188668115 | -0.84 | 0.000 | 8.85 | 5-Aminopentanoate        | 1.000 | -         | C00431 |
| POS | 6057903   | 3343178   | -0.86 | 0.001 | 1.19 | 3-Oxo-3-phenylpropanoate | 0.910 | -         | C07114 |
| POS | 5183266   | 2540111   | -1.03 | 0.020 | 1.02 | Indoleacetic acid        | 0.994 | -         | C00954 |
| POS | 107966974 | 50332260  | -1.10 | 0.000 | 5.51 | Allopurinol              | 0.994 | 315-30-0  | -      |
| POS | 51763885  | 23929467  | -1.11 | 0.000 | 4.01 | Leu                      | 0.888 | -         | C00123 |
| POS | 8409325   | 3775029   | -1.16 | 0.000 | 1.65 | 9-HpODE                  | 0.988 | -         | C14827 |
| POS | 11979498  | 4906848   | -1.29 | 0.000 | 2.04 | D-Serine                 | 0.676 | -         | C00740 |
| POS | 87051023  | 34168786  | -1.35 | 0.000 | 5.56 | Indoline                 | 0.989 | 496-15-1  | -      |
| POS | 34759789  | 13511227  | -1.36 | 0.002 | 3.27 | Pyrrolidine              | 0.999 | 123-75-1  | -      |
| POS | 44847539  | 17184849  | -1.38 | 0.029 | 3.23 | L-Pipecolic acid         | 0.978 | 3105-95-1 | C00408 |
| POS | 36492795  | 13136653  | -1.47 | 0.001 | 3.43 | Xanthine                 | 0.644 | 69-89-6   | C00385 |
| POS | 21794362  | 7610864   | -1.52 | 0.000 | 2.82 | 2-Aminoisobutyric acid   | 0.974 | 62-57-7   | -      |
| POS | 3881228   | 1353814   | -1.52 | 0.005 | 1.09 | Betulinic acid           | 0.807 | 472-15-1  | -      |
| POS | 29372168  | 9277598   | -1.66 | 0.000 | 3.49 | Furfural                 | 0.996 | -         | C14279 |
| POS | 3050542   | 934864    | -1.71 | 0.000 | 1.13 | Chlormadinone acetate    | 0.971 | 302-22-7  | -      |
| POS | 32814407  | 9668474   | -1.76 | 0.001 | 3.43 | L-Threonine              | 0.880 | -         | C00188 |
| POS | 27009391  | 7879500   | -1.78 | 0.006 | 2.94 | L-Glutamine              | 0.658 | 56-85-9   | C00064 |
| POS | 7662506   | 2223969   | -1.78 | 0.018 | 1.48 | Larixinic acid           | 0.999 | -         | C11918 |
| POS | 38891011  | 10609294  | -1.87 | 0.004 | 3.66 | Nicotinamide             | 0.656 | 98-92-0   | C00153 |
| POS | 55498649  | 15104402  | -1.88 | 0.013 | 4.09 | Kynurenic acid           | 0.995 | 492-27-3  | C01717 |

|     |           |           |       |       |       |                                             |       |            |        |
|-----|-----------|-----------|-------|-------|-------|---------------------------------------------|-------|------------|--------|
| POS | 5177093   | 1396157   | -1.89 | 0.011 | 1.28  | Stearidonic Acid                            | 0.844 | 20290-75-9 | C16300 |
| POS | 7437530   | 1951770   | -1.93 | 0.001 | 1.64  | 13-OxoODE                                   | 0.994 | -          | C14765 |
| POS | 25841660  | 6539222   | -1.98 | 0.000 | 3.31  | 9-OxoODE                                    | 0.987 | 54232-59-6 | C14766 |
| POS | 9883976   | 2432991   | -2.02 | 0.008 | 1.79  | Prostaglandin I2                            | 0.997 | 35121-78-9 | C01312 |
| POS | 115274629 | 27113155  | -2.09 | 0.003 | 6.49  | 5-Hydroxyindole-3-acetic acid               | 0.952 | 54-16-0    | C05635 |
| POS | 23345493  | 5396704   | -2.11 | 0.000 | 3.34  | Maltose                                     | 0.999 | -          | C00208 |
| POS | 49826960  | 11352618  | -2.13 | 0.000 | 4.87  | Adenosine                                   | 1.000 | -          | C00212 |
| POS | 518191274 | 117779702 | -2.14 | 0.019 | 12.74 | 1-Naphthylamine                             | 0.997 | -          | C14790 |
| POS | 10924235  | 2444643   | -2.16 | 0.000 | 2.13  | N-Acetylneuraminate                         | 0.912 | -          | C00270 |
| POS | 33897966  | 6505393   | -2.38 | 0.000 | 3.82  | Niacinamide                                 | 0.952 | -          | C00153 |
| POS | 4122851   | 739867    | -2.48 | 0.013 | 1.20  | Serotonin                                   | 0.944 | 50-67-9    | C00780 |
| POS | 21429496  | 3734835   | -2.52 | 0.006 | 2.90  | Creatinine                                  | 0.842 | 60-27-5    | C00791 |
| POS | 2660347   | 457001    | -2.54 | 0.000 | 1.10  | Methyl oleate                               | 0.771 | 112-62-9   | -      |
| POS | 20821548  | 3496480   | -2.57 | 0.011 | 2.70  | 13-HpODE                                    | 0.992 | -          | C04717 |
| POS | 4205544   | 686802    | -2.61 | 0.018 | 1.19  | Styrene                                     | 0.988 | -          | C07083 |
| POS | 30416965  | 4496233   | -2.76 | 0.018 | 3.26  | Phytosphingosine                            | 0.979 | 554-62-1   | C12144 |
| POS | 2209168   | 318118    | -2.80 | 0.000 | 1.07  | Xanthosine                                  | 0.908 | 146-80-5   | C01762 |
| POS | 4705746   | 621108    | -2.92 | 0.048 | 1.27  | Galangin                                    | 0.989 | -          | C10044 |
| POS | 25630527  | 2857860   | -3.16 | 0.001 | 3.47  | Genistein                                   | 0.994 | 446-72-0   | C09126 |
| POS | 24485286  | 2536441   | -3.27 | 0.007 | 3.12  | 16-Methoxy-2,3-dihydro-3-hydroxytabersonine | 0.983 | -          | C04578 |
| POS | 4506677   | 432968    | -3.38 | 0.013 | 1.37  | Morphine                                    | 0.796 | -          | C01516 |
| POS | 70282489  | 4985577   | -3.82 | 0.008 | 5.35  | 4-Hydroxyquinoline                          | 0.999 | 611-36-9   | -      |
| POS | 6992924   | 478162    | -3.87 | 0.001 | 1.86  | Guanosine                                   | 0.994 | 118-00-3   | C00387 |
| POS | 36395716  | 2337986   | -3.96 | 0.001 | 4.26  | Glycitein                                   | 0.988 | -          | C14536 |

|     |           |           |       |       |       |                                       |       |            |        |
|-----|-----------|-----------|-------|-------|-------|---------------------------------------|-------|------------|--------|
| POS | 47392536  | 1824287   | -4.70 | 0.000 | 5.11  | 4',7-dihydroxyisoflavone              | 0.996 | -          | C10208 |
| NEG | 6369703   | 86138     | -6.21 | 0.001 | 1.66  | Inosine                               | 0.971 | 58-63-9    | C00294 |
| NEG | 12957284  | 417874    | -4.95 | 0.000 | 2.38  | Chrysin                               | 0.872 | 480-40-0   | C10028 |
| NEG | 9726871   | 912731    | -3.41 | 0.000 | 2.01  | L-Ascorbic acid                       | 0.838 | -          | C00072 |
| NEG | 13213018  | 1461413   | -3.18 | 0.001 | 2.22  | 4',5,7-trihydroxyflavone              | 0.852 | -          | C01477 |
| NEG | 7263692   | 825389    | -3.14 | 0.000 | 1.71  | 3-Hydroxybutyric acid                 | 0.919 | -          | C01089 |
| NEG | 23851391  | 3059208   | -2.96 | 0.000 | 3.13  | Ferulate                              | 0.930 | -          | C01494 |
| NEG | 3301279   | 444260    | -2.89 | 0.000 | 1.15  | 2,5-Dihydroxybenzoate                 | 0.937 | -          | C00628 |
| NEG | 6270188   | 954490    | -2.72 | 0.000 | 1.58  | Uridine                               | 0.968 | 58-96-8    | C00299 |
| NEG | 4268723   | 718860    | -2.57 | 0.000 | 1.29  | Raffinose                             | 0.558 | -          | C00492 |
| NEG | 18103699  | 3390872   | -2.42 | 0.034 | 2.00  | Tropic acid                           | 0.871 | -          | C01456 |
| NEG | 7609838   | 1453137   | -2.39 | 0.008 | 1.53  | Taurocholic acid                      | 0.979 | 81-24-3    | C05122 |
| NEG | 147830650 | 28818378  | -2.36 | 0.042 | 5.51  | 3-(3-Hydroxyphenyl)<br>propionic acid | 0.975 | -          | C11457 |
| NEG | 15444188  | 3085022   | -2.32 | 0.000 | 2.37  | Melibiose                             | 0.891 | -          | C05402 |
| NEG | 83383965  | 17690555  | -2.24 | 0.000 | 5.52  | D-Lactic acid                         | 0.999 | -          | C00256 |
| NEG | 12239313  | 3036431   | -2.01 | 0.000 | 2.07  | Pyruvic acid                          | 0.929 | 127-17-3   | C00022 |
| NEG | 19783517  | 5573153   | -1.83 | 0.000 | 2.55  | D-(+)-Xylose                          | 0.965 | -          | C00181 |
| NEG | 3088958   | 889787    | -1.80 | 0.000 | 1.00  | PGJ2                                  | 0.861 | -          | C05957 |
| NEG | 34129614  | 9895624   | -1.79 | 0.001 | 3.03  | 13-HODE                               | 0.928 | -          | C14762 |
| NEG | 22683496  | 7529365   | -1.59 | 0.003 | 2.31  | 9-OxoODE                              | 0.981 | 54232-59-6 | C14766 |
| NEG | 788492021 | 282653771 | -1.48 | 0.000 | 15.20 | Dihomo-gamma-Linolenic Acid           | 0.629 | -          | C03242 |
| NEG | 28085719  | 10659340  | -1.40 | 0.001 | 2.49  | Xanthine                              | 0.993 | 69-89-6    | C00385 |
| NEG | 29244612  | 11137800  | -1.39 | 0.000 | 2.84  | L-Valine                              | 0.911 | 72-18-4    | C00183 |
| NEG | 10561464  | 4400274   | -1.26 | 0.000 | 1.54  | Allopurinol                           | 0.995 | 315-30-0   | -      |
| NEG | 179430752 | 76005889  | -1.24 | 0.011 | 5.49  | Cortisone                             | 0.992 | -          | C00762 |



|     |            |            |       |       |       |                          |       |          |        |
|-----|------------|------------|-------|-------|-------|--------------------------|-------|----------|--------|
| NEG | 31255915   | 14203126   | -1.14 | 0.000 | 2.68  | Propionic acid           | 0.998 | -        | C00163 |
| NEG | 655427246  | 324779982  | -1.01 | 0.000 | 11.83 | Palmitoleic acid         | 0.997 | 373-49-9 | C08362 |
| NEG | 722041308  | 380118466  | -0.93 | 0.001 | 12.10 | Arachidonic Acid         | 0.994 | 506-32-1 | C00219 |
| NEG | 18543317   | 13899236   | -0.42 | 0.013 | 1.15  | Nicotinate               | 0.748 | -        | C00253 |
| NEG | 44768261   | 54762046   | 0.29  | 0.000 | 2.10  | PGD2                     | 0.993 | -        | C00696 |
| NEG | 626870807  | 1098840569 | 0.81  | 0.000 | 14.62 | Deoxycholic acid         | 0.995 | 83-44-3  | C04483 |
| NEG | 1649139523 | 3511276563 | 1.09  | 0.000 | 29.79 | Lithocholic acid         | 0.998 | 434-13-9 | C03990 |
| NEG | 34496734   | 77557276   | 1.17  | 0.000 | 4.41  | Heptadecanoic acid       | 0.708 | 506-12-7 | -      |
| NEG | 18648117   | 46747798   | 1.33  | 0.000 | 3.54  | Adenine                  | 0.970 | 73-24-5  | C00147 |
| NEG | 1155911610 | 3624019076 | 1.65  | 0.000 | 34.36 | Cholic acid              | 0.991 | 81-25-4  | C00695 |
| NEG | 28393834   | 99014111   | 1.80  | 0.001 | 4.93  | 1,7-Dimethyluric acid    | 0.735 | -        | C16356 |
| NEG | 3002037    | 10670053   | 1.83  | 0.045 | 1.39  | Theophylline             | 0.976 | -        | C07130 |
| NEG | 35256806   | 192117391  | 2.45  | 0.000 | 7.97  | 1,3,7-Trimethyluric acid | 0.929 | -        | C16361 |
| NEG | 1497835    | 10333130   | 2.79  | 0.000 | 1.87  | Butylparaben             | 0.784 | 94-26-8  | -      |

Note:  $\log_2\_FC$  is a logarithmic value of GK-TBf/GKf
